# Supplementary material for: Cardiac Biomarkers and Risk Scores in Relation with History of Atherosclerotic Cardiovascular Disease in Patients Admitted with COVID-19: The Experience of an Eastern European Center
Source: MDPI journal article supplement (doi:10.3390/jcm11195671), 2022-09-26
Supplement: s1 [file s1]

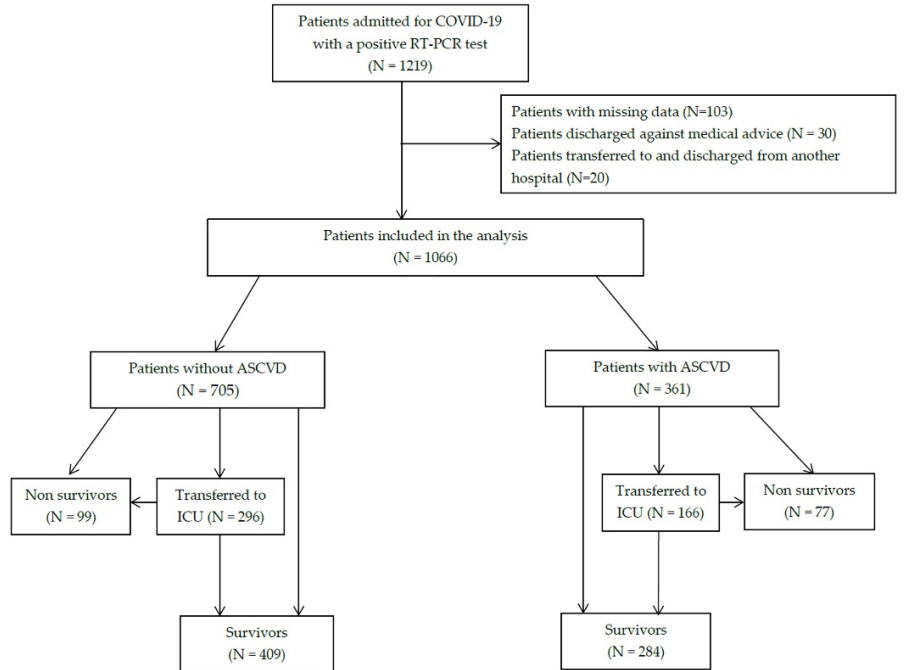

**Figure S1.** Flowchart of the study.

**Table S1.** Cardiac biomarkers upon admission showed significant differences based on the history of ASCVD and viral strain involved.

| Viral strain | Biomarker   | Without history of ASCVD | With ASCVD      | p-value |
|--------------|-------------|--------------------------|-----------------|---------|
| Alpha        | NT-pro BNP* | 670 [185-2492]           | 1675 [713-3831] | < 0.001 |
|              | hs-TnI*     | 7.2 [2.3-30.7]           | 13.9 [5.6-67.9] | 0.024   |
| Beta         | NT-pro BNP  | 525 [97-3068]            | 1217 [547-7673] | 0.027   |
|              | hs-TnI      | 3.0 [0.1-14.6]           | 11.6 [0.1-36.9] | 0.122   |
| Delta        | NT-pro BNP  | 872 [253-3445]           | 1466 [594-5850] | 0.003   |
|              | hs-TnI      | 13.7 [3.2-57.4]          | 17.1 [3.0-56.5] | 0.711   |
| Omicron      | NT-pro BNP  | 2445 [668-4426]          | 2311 [939-9188] | 0.485   |
|              | hs-TnI      | 13.6 [1.4-40.6]          | 10.5 [4.0-35.6] | 0.748   |

\* Values expressed as median [IQR].

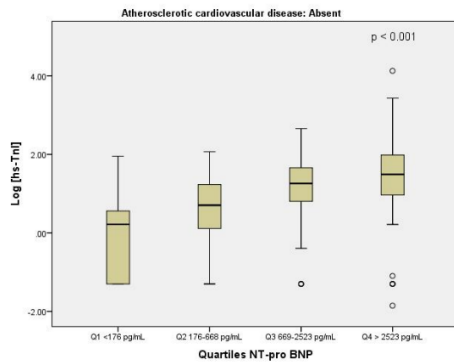

(a)

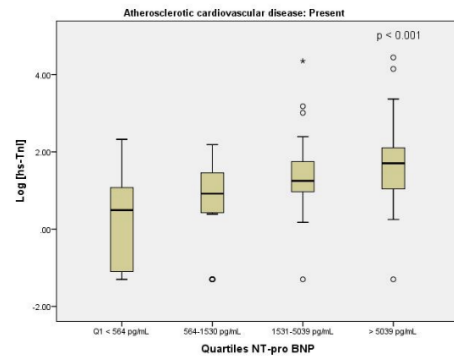

(b)

**Figure S2.** Significant correlations between NT-pro BNP quartiles and hs-TnI: (a) hs-TnI per log unit is correlated with NT-pro BNP quartiles in patients with no history of ASCVD; (b) NT-pro BNP quartiles are correlated with hs-TnI (per log. unit) in patients with history of ASCVD. °, represent outliers; \*, represent extreme values.

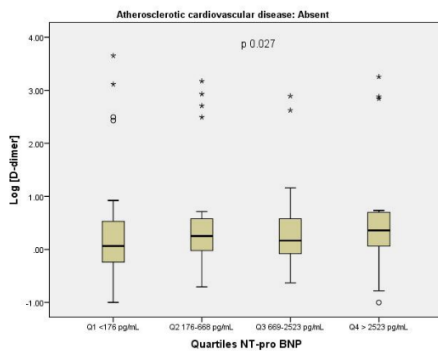

(a)

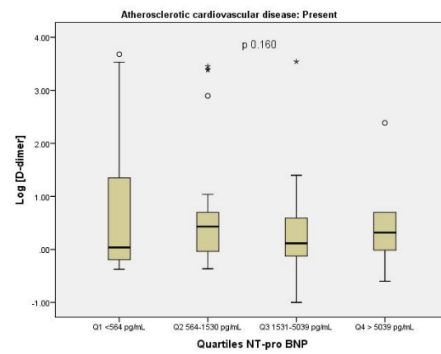

(b)

**Figure S3.** Correlation between NT-pro BNP quartiles and D-dimers: (a) D-dimers per log unit are correlated with NT-pro BNP quartiles in patients without history of ASCVD; (b) no statistically significant correlation between D-dimers per log unit and NT-pro BNP quartiles in patients with ASCVD. °, represent outliers; \*, represent extreme values.

**Table S2.** Cox proportional hazards model assessing the relationship between N-terminal B-type natriuretic peptide and the main outcome adjusted for multiple relevant covariates, including high sensitivity troponin I, in relation with the history of ASCVD.

|                            | Patients without ASCVD |         |                   |         | Patients with ASCVD |         |                   |         |
|----------------------------|------------------------|---------|-------------------|---------|---------------------|---------|-------------------|---------|
|                            | Univariate             |         | Multivariate      |         | Univariate          |         | Multivariate      |         |
|                            | HR (95%CI)             | P value | HR (95%CI)        | P value | HR (95%CI)          | P value | HR (95%CI)        | P value |
| NT-pro BNP*                | 1.70 (1.22-2.38)       | 0.002   | 1.62 (1.08-2.43)  | 0.020   | 2.37 (1.56-3.59)    | <0.001  | 2.69 (1.68-4.29)  | <0.001  |
| Strain (Delta)             | 2.51 (0.90-6.95)       | 0.078   | 7.22 (0.90-57.87) | 0.063   | 2.32 (1.08-4.99)    | 0.031   | 6.87 (1.35-35.07) | 0.020   |
| HT emergency               | 1.22 (0.78-1.90)       | 0.099   | 0.98 (0.47-2.03)  | 0.947   | 1.87 (1.09-3.20)    | 0.024   | 2.94 (1.19-7.28)  | 0.020   |
| CCI score                  | 1.17 (1.07-1.29)       | 0.001   | 1.05 (0.89-1.24)  | 0.563   | 1.10 (0.99-1.22)    | 0.081   | 1.11 (0.95-1.29)  | 0.195   |
| NEWS2 score > 5            | 1.68 (1.07-2.64)       | 0.023   | 0.69 (0.36-1.36)  | 0.284   | 1.16 (0.72-1.88)    | 0.053   | 1.31 (0.67-2.56)  | 0.426   |
| CoLACD score               | 1.14 (0.97-1.34)       | 0.098   | 1.12 (0.90-1.40)  | 0.312   | 1.11 (0.87-1.41)    | 0.094   | 1.12 (0.83-1.50)  | 0.454   |
| SaO <sub>2</sub> > 90%     | 0.22 (0.14-0.33)       | <0.001  | 0.37 (0.19-0.70)  | 0.002   | 0.31 (0.20-0.49)    | <0.001  | 0.63 (0.31-1.27)  | 0.195   |
| hs-CRP                     | 1.05 (1.03-1.06)       | <0.001  | 1.01 (0.97-1.04)  | 0.705   | 1.04 (1.03-1.06)    | <0.001  | 1.04 (1.01-1.07)  | 0.011   |
| BMI < 25 kg/m <sup>2</sup> | 0.57 (0.38-0.85)       | 0.006   | 0.83 (0.46-1.49)  | 0.523   | 0.46 (0.29-0.75)    | 0.002   | 0.56 (0.29-1.08)  | 0.082   |
| CKD                        | 0.40 (0.26-0.62)       | <0.001  | 0.71 (0.37-1.37)  | 0.307   | 0.51 (0.32-0.80)    | 0.003   | 1.37 (0.67-2.79)  | 0.384   |
| Anticoagulation**          | 0.56 (0.27-1.18)       | 0.017   | 1.18 (0.65-2.18)  | 0.581   | 0.44 (0.11-1.82)    | 0.098   | 1.05 (0.67-1.09)  | 0.486   |
| Age > 65 years             | 0.42 (0.26-0.67)       | <0.001  | 0.58 (0.30-1.13)  | 0.112   | 0.87 (0.51-1.50)    | 0.086   | 2.49 (1.56-3.98)  | 0.200   |
| hs-TnI*                    | 1.26 (0.95-1.68)       | 0.092   | 2.08 (0.78-5.51)  | 0.142   | 1.31 (1.03-1.65)    | 0.025   | 2.59 (0.70-9.55)  | 0.153   |

\*, per logarithmic unit; HT, hypertensive; CCI, Charlson Comorbidity Index; NEWS, National Early Warning Score; CoLACD, CoVID-19, Lymphocyte ratio, Age, CCI score, Dyspnea; SaO<sub>2</sub>, oxygen saturation upon admission; hs-CRP, high sensitivity C-reactive protein; BMI, body mass index; CKD, chronic kidney disease; \*\*, reference therapeutic dose.

**Table S3.** Cox proportional hazards model assessing the relationship between N-terminal B-type natriuretic peptide and the main outcome adjusted for multiple relevant covariates, including D-dimers, in relation with the history of ASCVD.

|                            | Patients without ASCVD |         |                   |         | Patients with ASCVD |         |                   |         |
|----------------------------|------------------------|---------|-------------------|---------|---------------------|---------|-------------------|---------|
|                            | Univariate             |         | Multivariate      |         | Univariate          |         | Multivariate      |         |
|                            | HR (95%CI)             | P value | HR (95%CI)        | P value | HR (95%CI)          | P value | HR (95%CI)        | P value |
| NT-pro BNP*                | 1.70 (1.22-2.38)       | 0.002   | 1.69 (1.09-2.63)  | 0.019   | 2.37 (1.56-3.59)    | <0.001  | 3.34 (1.89-5.88)  | <0.001  |
| Strain (Delta)             | 2.51 (0.90-6.95)       | 0.078   | 2.95 (0.35-24.66) | 0.318   | 2.32 (1.08-4.99)    | 0.031   | 5.66 (0.84-38.26) | 0.075   |
| HT emergency               | 1.22 (0.78-1.90)       | 0.099   | 0.95 (0.50-1.84)  | 0.889   | 1.87 (1.09-3.20)    | 0.024   | 2.21 (0.97-5.04)  | 0.060   |
| CCI score                  | 1.17 (1.07-1.29)       | 0.001   | 1.12 (0.94-1.32)  | 0.207   | 1.10 (0.99-1.22)    | 0.081   | 1.10 (0.90-1.35)  | 0.335   |
| NEWS2 score > 5            | 1.68 (1.07-2.64)       | 0.023   | 0.57 (0.27-1.21)  | 0.146   | 1.16 (0.72-1.88)    | 0.053   | 1.71 (0.77-3.80)  | 0.190   |
| CoLACD score               | 1.14 (0.97-1.34)       | 0.098   | 1.03 (0.79-1.35)  | 0.813   | 1.11 (0.87-1.41)    | 0.094   | 1.18 (0.84-1.66)  | 0.328   |
| SaO <sub>2</sub> > 90%     | 0.22 (0.14-0.33)       | <0.001  | 0.28 (0.14-0.58)  | 0.001   | 0.31 (0.20-0.49)    | <0.001  | 0.48 (0.21-1.10)  | 0.081   |
| hs-CRP                     | 1.05 (1.03-1.06)       | <0.001  | 1.01 (0.97-1.05)  | 0.617   | 1.04 (1.03-1.06)    | <0.001  | 1.04 (1.00-1.07)  | 0.051   |
| BMI < 25 kg/m <sup>2</sup> | 0.57 (0.38-0.85)       | 0.006   | 0.79 (0.41-1.50)  | 0.463   | 0.46 (0.29-0.75)    | 0.002   | 0.42 (0.20-0.89)  | 0.024   |
| CKD                        | 0.40 (0.26-0.62)       | <0.001  | 0.60 (0.29-1.24)  | 0.167   | 0.51 (0.32-0.80)    | 0.003   | 1.57 (0.67-3.64)  | 0.299   |
| Anticoagulation**          | 0.56 (0.27-1.18)       | 0.017   | 0.63 (0.39-1.03)  | 0.067   | 0.44 (0.11-1.82)    | 0.098   | 0.65 (0.34-1.24)  | 0.193   |
| Age > 65 years             | 0.42 (0.26-0.67)       | <0.001  | 0.67 (0.33-1.36)  | 0.267   | 0.87 (0.51-1.50)    | 0.086   | 1.47 (0.61-3.55)  | 0.397   |
| D-dimers*                  | 1.23 (0.89-1.68)       | 0.207   | 1.18 (0.76-1.84)  | 0.461   | 1.11 (0.82-1.51)    | 0.513   | 1.29 (0.77-2.17)  | 0.335   |

\*, per logarithmic unit; HT, hypertensive; CCI, Charlson Comorbidity Index; NEWS, National Early Warning Score; CoLACD, CoVID-19, Lymphocyte ratio, Age, CCI score, Dyspnea; SaO<sub>2</sub>, oxygen saturation upon admission; hs-CRP, high sensitivity C-

reactive protein; BMI, body mass index; CKD, chronic kidney disease; \*\*, reference therapeutic dose.

**Table S4:** Model assessing the relationship between N-terminal pro B-type natriuretic peptide and MACE adjusted for multiple relevant covariates, based on the history of ASCVD.

| Variable       | Patients without ASCVD |         |                   |         | Patients with ASCVD |         |                   |         |
|----------------|------------------------|---------|-------------------|---------|---------------------|---------|-------------------|---------|
|                | Univariate             |         | Multivariate      |         | Univariate          |         | Multivariate      |         |
|                | HR (95%CI)             | P value | HR (95%CI)        | P value | HR (95%CI)          | P value | HR (95%CI)        | P value |
| Age            | 1.01 (0.99-1.03)       | 0.031   | 1.03 (0.98-1.08)  | 0.311   | 1.00 (0.97-1.04)    | 0.083   | 0.91 (0.85-0.99)  | 0.021   |
| Smoking        | 1.16 (0.48-2.81)       | 0.056   | 1.05 (0.21-5.23)  | 0.951   | 1.08 (0.43-2.74)    | 0.088   | 6.44 (0.70-59.16) | 0.100   |
| CCI            | 1.11 (0.96-1.28)       | 0.045   | 0.62 (0.40-0.96)  | 0.030   | 1.05 (0.88-1.25)    | 0.073   | 1.17 (0.83-1.66)  | 0.379   |
| HT emergency   | 1.22 (0.61-2.42)       | 0.055   | 0.84 (0.28-2.49)  | 0.752   | 2.06 (0.86-4.93)    | 0.056   | 3.90 (0.72-21.08) | 0.114   |
| hs-CRP         | 1.01 (0.99-1.04)       | 0.058   | 0.99 (0.95-1.04)  | 0.807   | 1.00 (0.96-1.04)    | 0.089   | 0.95 (0.87-1.04)  | 0.284   |
| Corticotherapy | 2.46 (0.80-7.61)       | 0.060   | 0.85 (0.09-8.26)  | 0.892   | 0.99 (0.32-3.11)    | 0.100   | 1.45 (0.21-10.02) | 0.707   |
| NT-pro BNP*    | 2.72 (1.58-4.68)       | < 0.001 | 4.61 (2.00-10.64) | <0.001  | 4.88 (2.21-10.78)   | < 0.001 | 5.23 (1.64-16.62) | 0.005   |
| DM             | 0.51 (0.24-1.07)       | 0.075   | 0.31 (0.09-1.04)  | 0.059   | 1.04 (0.38-2.83)    | 0.091   | 0.59 (0.11-3.27)  | 0.548   |

\*, per log. unit; CCI, Charlston Comorbidity index; HT, hypertensive; hs-CRP, high-sensitivity C-reactive protein; DM, diabetes mellitus.

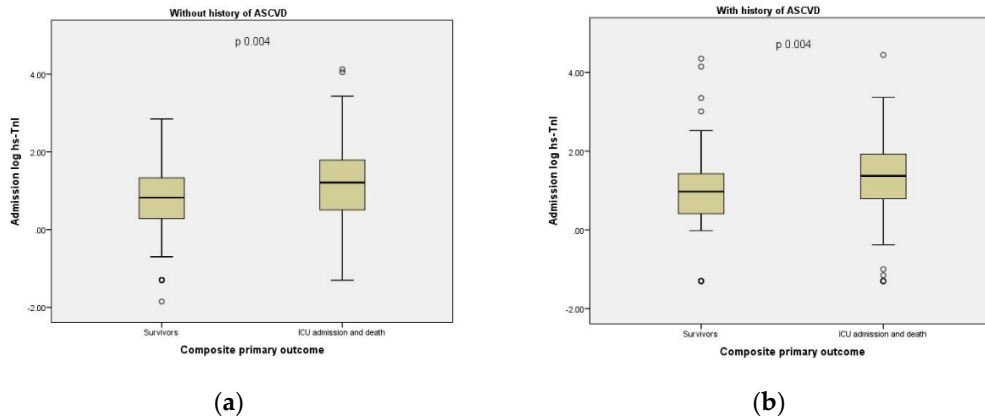

**Figure S4.** Boxplots revealing significant correlations between admission hs-TnI and the main composite outcome: (a) In patients without a history of ASCVD; (b) In patients with ASCVD. °, represent outliers.

Table S5: Model assessing the relationship between hs-TnI and MACE adjusted for multiple relevant covariates, based on the history of ASCVD.

| Variable       | Patients without ASCVD |         |                   |         | Patients with ASCVD |         |                   |         |
|----------------|------------------------|---------|-------------------|---------|---------------------|---------|-------------------|---------|
|                | Univariate             |         | Multivariate      |         | Univariate          |         | Multivariate      |         |
|                | HR (95%CI)             | P value | HR (95%CI)        | P value | HR (95%CI)          | P value | HR (95%CI)        | P value |
| Age            | 1.01 (0.99-1.03)       | 0.031   | 1.00 (0.96-1.05)  | 0.897   | 1.00 (0.97-1.04)    | 0.083   | 0.96 (0.89-1.04)  | 0.343   |
| Smoking        | 1.16 (0.48-2.81)       | 0.056   | 2.03 (0.24-17.01) | 0.514   | 1.08 (0.43-2.74)    | 0.088   | 1.24 (0.18-8.53)  | 0.828   |
| CCI            | 1.11 (0.96-1.28)       | 0.045   | 0.83 (0.56-1.22)  | 0.335   | 1.05 (0.88-1.25)    | 0.073   | 1.11 (0.77-1.61)  | 0.569   |
| HT emergency   | 1.22 (0.61-2.42)       | 0.055   | 1.52 (0.51-4.50)  | 0.452   | 2.06 (0.86-4.93)    | 0.056   | 3.05 (0.55-16.75) | 0.200   |
| hs-CRP         | 1.01 (0.99-1.04)       | 0.058   | 1.00 (0.96-1.05)  | 0.885   | 1.00 (0.96-1.04)    | 0.089   | 0.95 (0.87-1.05)  | 0.312   |
| Corticotherapy | 2.46 (0.80-7.61)       | 0.060   | 0.91 (0.10-8.41)  | 0.933   | 0.99 (0.32-3.11)    | 0.100   | 2.06 (0.29-14.50) | 0.469   |
| hs-TnI*        | 1.60 (1.08-2.38)       | 0.019   | 1.63 (1.02-2.60)  | 0.042   | 1.95 (1.25-3.04)    | 0.003   | 3.26 (1.51-7.06)  | 0.003   |
| DM             | 0.51 (0.24-1.07)       | 0.075   | 2.22 (0.66-7.44)  | 0.195   | 1.04 (0.38-2.83)    | 0.091   | 2.97 (0.60-14.77) | 0.183   |

\*, per log. unit; CCI, Charlston Comorbidity index; HT, hypertensive; hs-CRP, high-sensitivity C-reactive protein; hs-TnI, hgh-sensitivity troponin I; DM, diabetes mellitus.

Table S6. Cox proportional hazards model assessing the relationship between N-terminal B-type natriuretic peptide and the main outcome adjusted for multiple relevant covariates, including D-dimers, and hs-TnI, in relation with the history of ASCVD.

|                   | Patients without ASCVD |         |                   |         | Patients with ASCVD |         |                   |         |
|-------------------|------------------------|---------|-------------------|---------|---------------------|---------|-------------------|---------|
|                   | Univariate             |         | Multivariate      |         | Univariate          |         | Multivariate      |         |
|                   | HR (95%CI)             | P value | HR (95%CI)        | P value | HR (95%CI)          | P value | HR (95%CI)        | P value |
| NT-pro BNP*       | 1.70 (1.22-2.38)       | 0.002   | 1.82 (1.02-3.26)  | 0.043   | 2.37 (1.56-3.59)    | <0.001  | 3.54 (1.98-6.33)  | <0.001  |
| Strain (Delta)    | 2.51 (0.90-6.95)       | 0.078   | 3.11 (0.34-28.33) | 0.315   | 2.32 (1.08-4.99)    | 0.031   | 3.46 (0.37-32.14) | 0.275   |
| HT emergency      | 1.22 (0.78-1.90)       | 0.099   | 1.10 (0.50-2.43)  | 0.821   | 1.87 (1.09-3.20)    | 0.024   | 2.05 (0.70-5.96)  | 0.190   |
| CCI score         | 1.17 (1.07-1.29)       | 0.001   | 1.12 (0.91-1.39)  | 0.276   | 1.10 (0.99-1.22)    | 0.081   | 1.02 (0.75-1.38)  | 0.906   |
| NEWS2 score > 5   | 1.68 (1.07-2.64)       | 0.023   | 0.48 (0.18-1.31)  | 0.152   | 1.16 (0.72-1.88)    | 0.053   | 3.17 (1.09-9.26)  | 0.035   |
| CoLACD score      | 1.14 (0.97-1.34)       | 0.098   | 1.09 (0.78-1.50)  | 0.620   | 1.11 (0.87-1.41)    | 0.094   | 1.29 (0.81-2.05)  | 0.290   |
| SaO2 > 90%        | 0.22 (0.14-0.33)       | <0.001  | 0.26 (0.11-0.64)  | 0.004   | 0.31 (0.20-0.49)    | <0.001  | 0.19 (0.06-0.62)  | 0.006   |
| hs-CRP            | 1.05 (1.03-1.06)       | <0.001  | 1.04 (0.99-1.08)  | 0.090   | 1.04 (1.03-1.06)    | <0.001  | 1.09 (1.03-1.14)  | 0.001   |
| BMI < 25 kg/m2    | 0.57 (0.38-0.85)       | 0.006   | 0.77 (0.35-1.71)  | 0.521   | 0.46 (0.29-0.75)    | 0.002   | 0.59 (0.18-1.92)  | 0.383   |
| CKD               | 0.40 (0.26-0.62)       | <0.001  | 0.74 (0.31-1.76)  | 0.490   | 0.51 (0.32-0.80)    | 0.003   | 3.15 (1.01-9.88)  | 0.049   |
| Anticoagulation** | 0.56 (0.27-1.18)       | 0.017   | 0.43 (0.23-0.80)  | 0.007   | 0.44 (0.11-1.82)    | 0.098   | 0.47 (0.17-1.27)  | 0.135   |
| Age > 65 years    | 0.42 (0.26-0.67)       | <0.001  | 0.52 (0.22-1.21)  | 0.131   | 0.87 (0.51-1.50)    | 0.086   | 1.88 (0.46-7.73)  | 0.381   |
| D-dimers*         | 1.23 (0.89-1.68)       | 0.207   | 1.26 (0.75-2.13)  | 0.386   | 1.11 (0.82-1.51)    | 0.513   | 1.95 (0.91-4.21)  | 0.087   |
| hs-TnI*           | 1.26 (0.95-1.68)       | 0.092   | 0.95 (0.69-1.32)  | 0.773   | 1.31 (1.03-1.65)    | 0.025   | 2.52 (1.39-4.56)  | 0.002   |

\*, per logarithmic unit; HT, hypertensive; CCI, Charlson Comorbidity Index; NEWS, National Early Warning Score; CoLACD, CoVID-19, Lymphocyte ratio, Age, CCI score, Dyspnea; SaO2, oxygen saturation upon admission; hs-CRP, high sensitivity C-reactive protein; BMI, body mass index; CKD, chronic kidney disease; \*\*, reference therapeutic dose.

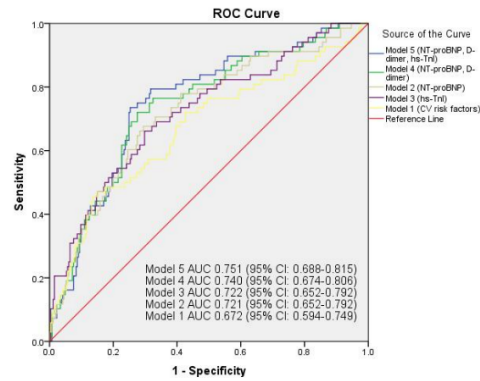

**Figure S5.** Receiver operating characteristic (ROC) curve assessed the discriminatory ability of the adjusted models including classical cardiovascular risk factors predictive for composite end-point ICU admission and death in patients with mild-to-moderate COVID-19 and ASCVD (model 1), to which were added NT-proBNP (model 2), hs-TnI (model 3), NT-proBNP and D-dimer (model 4), and NT-proBNP with D-dimer hs-TnI (model 5).
